RESEARCH ARTICLE

# Risk Factors for Central Lymph Node Metastasis in CNO Papillary Thyroid Carcinoma: A Systematic Review and Meta-Analysis

Wei Sun, Xiabin Lan, Hao Zhang\*, Wenwu Dong, Zhihong Wang, Liang He, Ting Zhang, Siming Liu

Department of Thyroid Surgery, The First Hospital of China Medical University, Shenyang, Liaoning Province, China

\* [haozhang@mail.cmu.edu.cn](mailto:haozhang@mail.cmu.edu.cn)

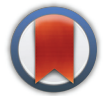

CrossMark  
click for updates

OPEN ACCESS

**Citation:** Sun W, Lan X, Zhang H, Dong W, Wang Z, He L, et al. (2015) Risk Factors for Central Lymph Node Metastasis in CNO Papillary Thyroid Carcinoma: A Systematic Review and Meta-Analysis. PLoS ONE 10(10): e0139021. doi:10.1371/journal.pone.0139021

**Editor:** Rafael Rosell, Catalan Institute of Oncology, SPAIN

**Received:** June 7, 2015

**Accepted:** September 7, 2015

**Published:** October 2, 2015

**Copyright:** © 2015 Sun et al. This is an open access article distributed under the terms of the [Creative Commons Attribution License](https://creativecommons.org/licenses/by/4.0/), which permits unrestricted use, distribution, and reproduction in any medium, provided the original author and source are credited.

**Data Availability Statement:** All relevant data are within the paper and its Supporting Information files.

**Funding:** This work was supported by Liaoning BaiQianWan Talents Program (No. 2014921033), URLs: [www.cn.hrss.gov.cn/lm/99/10/2014/11/i45652.shtml](http://www.cn.hrss.gov.cn/lm/99/10/2014/11/i45652.shtml).

**Competing Interests:** The authors have declared that no competing interests exist.

## Abstract

### Background

Central lymph node metastasis (CLNM) is common in papillary thyroid carcinoma (PTC). Prophylactic central lymph node dissection (PCLND) for patients with clinically negative central compartment lymph nodes (CNO) remains controversial. The phrase “clinically negative” is used to indicate that patients exhibited no clinical evidence of CLNM by ultrasonography (US) or computerized tomography (CT) preoperatively. In this study, we analyze the risk factors for CLNM in CNO patients.

### Methods

The PUBMED and SCIE databases were systematically searched for works published through January 31, 2015. All of the patients included in this study underwent thyroidectomy+PCLND. Revman 5.3 software was used to analyze the data.

### Results

Twenty studies and 9084 patients were included in this meta-analysis. The following variables were associated with an increased risk of CLNM in CNO patients: age < 45 years (OR = 1.59, 95% CI = 1.42–1.78, p<0.00001), male sex (OR = 1.95, 95% CI = 1.63–2.32, p<0.00001), multifocality (OR = 1.43, 95% CI = 1.22–1.67, p<0.00001), tumor size > 2 cm for PTC patients (OR = 2.98, 95% CI 2.08–4.28, p<0.00001) or tumor size > 0.5 cm for papillary thyroid microcarcinoma (PTMC) patients (OR = 2.30, 95% CI = 1.71–3.09, p<0.00001), location of the primary tumor in the central area and low pole (OR = 1.86, 95% CI = 1.48–2.33, p<0.00001), lymphovascular invasion (OR = 4.35, 95% CI = 2.24–8.46, p<0.0001), extrathyroidal extension (OR = 2.27, 95% CI = 1.76–2.94, p<0.00001), and capsular invasion (OR = 1.72, 95% CI = 1.39–2.41, p<0.00001). PTC (tumor size>1cm) exhibited a higher risk factor associated with CLNM than PTMC (tumor size<1cm) (OR = 2.83, 95% CI

= 2.15–3.72,  $p < 0.00001$ ). Bilateral tumors (OR = 1.21, 95% CI = 0.92–1.58,  $p = 0.17$ ) and lymphocytic thyroiditis (OR = 0.88, 95% CI = 0.71–1.09,  $p = 0.25$ ) had no association with CLNM in CN0 patients.

## Conclusions

Our systematic review identified several clinical features associated with CLNM in CN0 patients, including age, sex, multifocality, size, location, lymphovascular invasion, capsular invasion, and extrathyroidal extension. These factors should guide the application of PCLND in CN0 patients.

## Introduction

Thyroid cancer, the most prevalent endocrine malignancy, accounts for 1% of all malignant neoplasms and 2.7% of all malignant tumors in females, representing the ninth-most common cancer in women[1,2]. Papillary thyroid carcinoma (PTC) is the most common histological subtype of thyroid cancer, comprising 80–85% of all thyroid malignancies[1]. The prognosis of PTC is favorable, with a 10-year survival  $>91\%$  and 15-year survival  $>87\%$ [3,4]. Central lymph node metastasis (CLNM) is observed in 20%–90% of patients[5,6]. The significance of lymph node metastasis in PTC patients remains controversial. Previous studies reported that lymph node metastasis may only impact recurrence but not survival[7]. However, recent emerging evidence from a large-scale nested case-control study indicated that lymph node metastasis and incomplete surgical excision are the two primary characteristics associated with higher morbidity[1]. Furthermore, some scholars considered the presence of central lymph nodes to be as important as primary tumors[8].

Prophylactic central lymph node dissection (PCLND) is frequently performed in patients with clinically negative central lymph nodes (CN0). It remains controversial whether elective or prophylactic CLND should be applied in patients with T1 and T2 cancer[9]. The benefits of PCLND for CN0 patients are manifold. First, PCLND can facilitate the diagnosis of an accurate TNM stage and may contribute to the decision to use radioactive iodine (RAI) therapy or thyroid stimulating hormone (TSH) suppressive therapy[10,11]. Second, PCLND may decrease recurrence, increase disease-specific survival, and reduce the Tg levels during postoperative follow-up[7]. In addition, PCLND can help to avoid a reoperation and any associated complications[11,12]. PCLND may be significant for therapy as well as the prognosis of PTC, especially for patients older than 45 years. Because patients older than 45 years exhibit a decreasing capacity to uptake RAI, RAI therapy may be less effective[13]. However, no overwhelming evidence has proven that PCLND definitively improves patient prognosis[14–16]. Although some studies indicate that there is no difference between the outcomes of thyroidectomy and thyroidectomy+PCLND for experienced surgeons[17,18], many authors believe that this statement does not represent the true morbidity rates of patients in whom PCLND is performed. Not all the surgeons are experienced thyroid surgeons, and there is indeed an association between PCLND and postoperative complications[19,20].

Neck ultrasound (US) and contrast enhanced computed tomography (CT) are widely used for preoperative imaging to visualize the CLNM lesions. However, both US and contrast-enhanced CT are not particularly accurate, with low sensitivities of 23%–53.2% and 41%–66.7%, respectively[21,22]. The high incidence of CLNM and low sensitivity of US and CT make it challenging to determine which factors are associated with subclinical CLNM. The

phrase “subclinical CLNM” indicates CN0 patients who are proved to have CLNM that is pathologically confirmed intraoperatively or postoperatively. Although many risk factors have been analyzed in many studies for CN0 patients, the results are inconsistent. Thus, we performed a systematic review to assess the clinical features of CLNM in CN0 patients.

## Materials and Methods

Our systematic review was conducted according to the guidelines proposed by the preferred reporting items for systematic reviews and meta-analyses (PRISMA) statement[23]. ([S1 PRISMA Checklist.](#))

### Search strategy

A comprehensive literature research was performed using the PubMed and Web of Science databases for studies published through January 31, 2015 using the key words (“thyroid cancer or thyroid carcinoma or thyroid neoplasm” AND “papillary”) OR (“PTC”) AND (“central or central compartment or level IV” AND “lymph nodes”). Two authors (Sun W and Lan XB) performed the selection process independently, and the discrepancies were resolved by discussion.

### Selection criteria

In this systematic review, we included studies that met the following criteria: a) prospective or retrospective original literature; b) English language; c) none of the patients had clinical evidence of CLNM preoperatively; d) all of the patients underwent thyroidectomy plus unilateral or bilateral PCLND, and PTC was pathologically confirmed intraoperatively or postoperatively; and e) completed medical records were available for data extraction. The following exclusion criteria were used to eliminate studies from our meta-analysis: a) patients who had undergone prior head and neck irradiation or oncological surgery; b) reviews, letters to the editor, abstracts or meeting proceedings; and c) patients with a family history of thyroid cancer.

### Data extraction and quality assessment

Two authors abstracted the relevant data from the included articles in accordance with the prepared standardized form. Authors, publication years, countries of study, study design, PTC or papillary thyroid microcarcinoma (PTMC), case number, surgery intervention, 10 possible risk factors and the corresponding numbers of patients were recorded independently. The risk factors included the following: age, sex, multifocality, size, location, lymphovascular invasion, capsular invasion, extrathyroidal extension, bilateral tumors, and lymphocytic thyroiditis. Central lymph nodes were divided into three or four subgroups in some articles: ipsilateral paratracheal, pretracheal, contralateral paratracheal, and prelaryngeal. We included only the data on ipsilateral paratracheal nodes. The Newcastle-Ottawa quality assessment scale was used to assess the quality of the studies.

### Statistical analysis

All of the statistical analyses were performed using Revman software (5.3). The results are presented as odds ratios (ORs) with a 95% confidence interval (CI), and a  $p$  value  $< 0.05$  was considered statistically significant, except where otherwise specified. Moreover, heterogeneity was quantified using the Q-test and the  $I^2$  statistic. When  $p > 0.1$  and  $I^2 < 50\%$ , a fixed-effect model was used; otherwise, a random-effects model was applied. Possible publication bias was tested by Begg’s funnel plot.

## Results

After screening for studies, 1460 studies were initially considered for inclusion in this meta-analysis. A total of 195 studies were excluded because of duplication and language. Approximately 1214 reviews, case reports, and irrelevant studies were excluded after carefully scanning titles and abstracts. The remaining 51 articles were subjected to an evaluation of the full text. A total of 20 studies and 9084 patients were included in our meta-analysis after applying the inclusion criteria; 3 studies were prospective, and 17 studies were retrospective. The basic

**Table 1. Basic characteristics of included studies.**

| Author                 | Year | Country | Study design        | PTC/PTMC | Case number | Surgical intervention                                              | Quality assessment |
|------------------------|------|---------|---------------------|----------|-------------|--------------------------------------------------------------------|--------------------|
| Lim, Y. C [24]         | 2009 | Korea   | retrospective study | PTMC     | 86          | TT+bilateral CLND                                                  | 8                  |
| Ying Jie Wu [25]       | 2013 | China   | retrospective study | PTC      | 228         | TT +ipsilateral CLND                                               | 6                  |
| Jong-Lyel Roh [26]     | 2011 | Korea   | prospective study   | PTC      | 184         | TT+bilateral CLND                                                  | 8                  |
| Q Wang B [27]          | 2014 | China   | retrospective study | PTC      | 188         | TT+bilateral CLND or lobectomy plus isthmusectomy+ipsilateral CLND | 7                  |
| Lie-Hao Jiang [28]     | 2014 | China   | retrospective study | PTC      | 916         | TT+bilateral CLND or lobectomy plus isthmusectomy+ipsilateral CLND | 7                  |
| Wendong Wang [29]      | 2013 | China   | retrospective study | PTC      | 276         | TT+bilateral CLND or lobectomy plus isthmusectomy+ipsilateral CLND | 7                  |
| Yi-Li Zhou [30]        | 2012 | China   | Retrospective study | PTMC     | 122         | TT+bilateral CLND                                                  | 9                  |
| Bo-Yeon Kim [31]       | 2012 | Korea   | retrospective study | PTMC     | 160         | TT+bilateral CLND                                                  | 9                  |
| Yinlong Yang [32]      | 2014 | China   | retrospective study | PTMC     | 291         | TT+bilateral CLND                                                  | 9                  |
| SuSheng Miao [33]      | 2013 | China   | prospective study.  | PTC      | 184         | TT+bilateral CLND                                                  | 8                  |
| Bon Seok Koo [34]      | 2009 | Korea   | prospectively study | PTC      | 111         | TT+bilateral CLND                                                  | 9                  |
| Park J.P. [35]         | 2014 | Korea   | retrospective study | PTMC     | 193         | TT+bilateral CLND or lobectomy plus isthmusectomy+ipsilateral CLND | 7                  |
| Keke Liang [36]        | 2014 | China   | retrospective study | PTC      | 529         | TT+bilateral CLND or lobectomy plus isthmusectomy+ipsilateral CLND | 7                  |
| Yoon Kyoung So [37]    | 2010 | Korea   | retrospective study | PTMC     | 551         | TT+bilateral CLND                                                  | 8                  |
| Gilberto Teixeira [38] | 2011 | Brazil  | retrospective study | PTC      | 72          | TT+ipsilateral CLND                                                | 7                  |
| Yasuhiro Ito [39]      | 2013 | Japan   | retrospective study | PTC      | 3219        | TT/NTT+ipsilateral or bilateral CLND                               | 7                  |
| Lee K.E. [40]          | 2012 | Korea   | retrospective study | PTC      | 161         | TT+bilateral CLND                                                  | 8                  |
| LING-NA MAO [41]       | 2015 | China   | retrospective study | PTC      | 389         | TT+ipsilateral or bilateral CLND                                   | 7                  |
| Mujgan Caliskan [42]   | 2012 | Korea   | retrospective study | PTMC     | 332         | TT+ipsilateral or bilateral CLND                                   | 7                  |
| Sang-Hyuk Lee [43]     | 2008 | Korea   | retrospective study | PTMC     | 842         | TT/NTT+ipsilateral CLND                                            | 7                  |
|                        |      |         |                     | PTMC     | 50          | TT+bilateral CLND                                                  | 9                  |

TT: Total thyroidectomy. NTT: Nearly total thyroidectomy PTMC: papillary thyroid microcarcinoma

doi:10.1371/journal.pone.0139021.t001

characteristics of the papers are summarized in [Table 1](#) and the original data is presented in [S1 Table](#). Begg's funnel plots are presented in the supporting information section. A flow chart of the selection process for the studies included in the meta-analysis is presented in [Fig 1](#).

### Age

A fixed-effects model was applied in this analysis ( $p = 0.16$ ,  $I^2 = 24\%$ ). Among CN0 patients, the rate of CLNM was 46.16% in patients <45 years and 34.48% in the patients >45 years. The results indicate that age <45 years was associated with an increased rate of CLNM in CN0 patients (OR = 1.59, 95% CI = 1.42–1.78,  $p < 0.00001$ ) ([Fig 2](#)).

### Sex

A random-effects model was adopted to analyze the data ( $p = 0.06$ ,  $I^2 = 35\%$ ). The incidence of CLNM was 58.92% in men and 47.11% in women. Male CN0 patients exhibited a significantly higher incidence of CLNM (OR = 1.95, 95% CI = 1.63–2.32,  $p < 0.00001$ ) ([Fig 3](#)).

### Multifocality

A random-effects model was applied to assess heterogeneity ( $p = 0.10$ ,  $I^2 = 33\%$ ). Sixteen studies were included in the analysis of tumor multifocality. We observed a positive correlation between the number of foci and the incidence of CLNM in CN0 patients (OR = 1.43, 95% CI = 1.22–1.67,  $p < 0.0001$ ) ([Fig 4](#)).

### Size

Seven and eight studies were included in the analysis of the influence of tumor size in patients with PTC and PTMC, respectively. For patients with PTC, a random-effects model was used

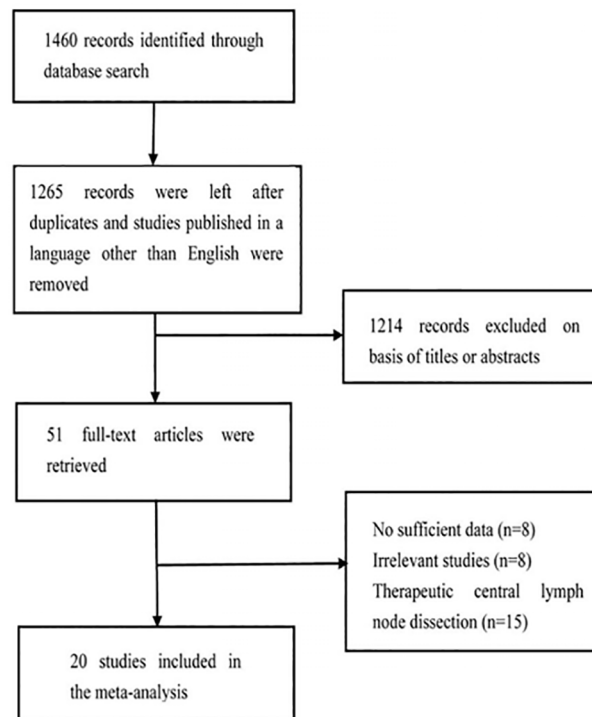

**Fig 1. Flow chart of the study selection process.**

doi:10.1371/journal.pone.0139021.g001

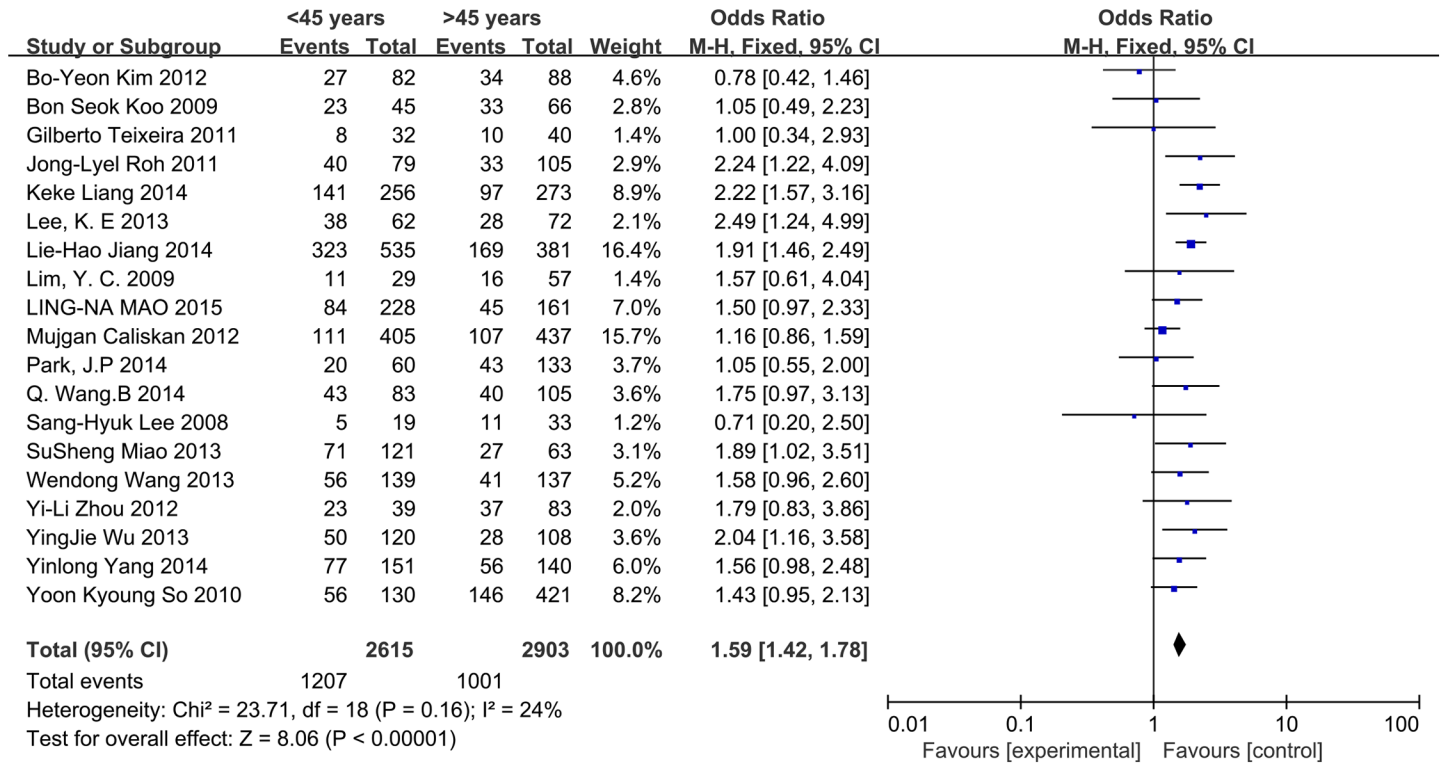

Fig 2. Forest plots of the association between age and CLNM in CN0 patients.

doi:10.1371/journal.pone.0139021.g002

( $p = 0.001$ ,  $I^2 = 72\%$ ). Tumor size  $>2$  cm was significantly associated with CLNM in CN0 PTC patients (OR = 2.98, 95% CI = 2.08–4.28,  $p < 0.00001$ ). For patients with PTMC, 0.5 cm was established as the cut-off value. A random-effects model was used ( $p = 0.06$ ,  $I^2 = 48\%$ ). Tumor size  $>0.5$  cm was identified as a risk factor associated with CLNM in CN0 patients (OR = 2.30, 95% CI = 1.71–3.09,  $p < 0.00001$ ) (Figs 5 and 6). We also analyzed whether the prevalence of CLNM was different between PTC and PTMC. A random-effects model was applied ( $p = 0.008$ ,  $I^2 = 61\%$ ). PTC (tumor size  $>1$ cm) exhibited a higher risk factor associated with CLNM than PTMC (tumor size  $<1$ cm) (OR = 2.83, 95% CI = 2.15–3.72,  $p < 0.00001$ ) (Fig 7).

### Location

The influence of tumor location on CLNM in CN0 patients was assessed in 6 studies. We divided the thyroid into three areas: upper pole, central area, and lower pole. Approximately 31.81%, 46.77%, and 46.65% located in the upper pole, central area, and lower pole, respectively, exhibited CLNM. When pooling the central area and lower pole for comparison with the upper pole, we observed that tumors located in the central area and lower pole of the thyroid lobe were associated with a high rate of CLNM (OR = 1.86, 95% CI = 1.48–2.33,  $p < 0.00001$ ). A fixed-effects model was used to analyze the data ( $I^2 = 44\%$ ,  $p = 0.11$ ) (Fig 8).

### Lymphovascular invasion

A random-effects model was applied to analyze these data ( $I^2 = 46\%$ ,  $p = 0.08$ ). Seven included studies were investigated. Lymphovascular invasion exhibited a 4.35-fold increased risk of CLNM in CN0 patients (OR = 4.35, 95% CI = 2.24–8.46,  $p < 0.0001$ ) (Fig 9).

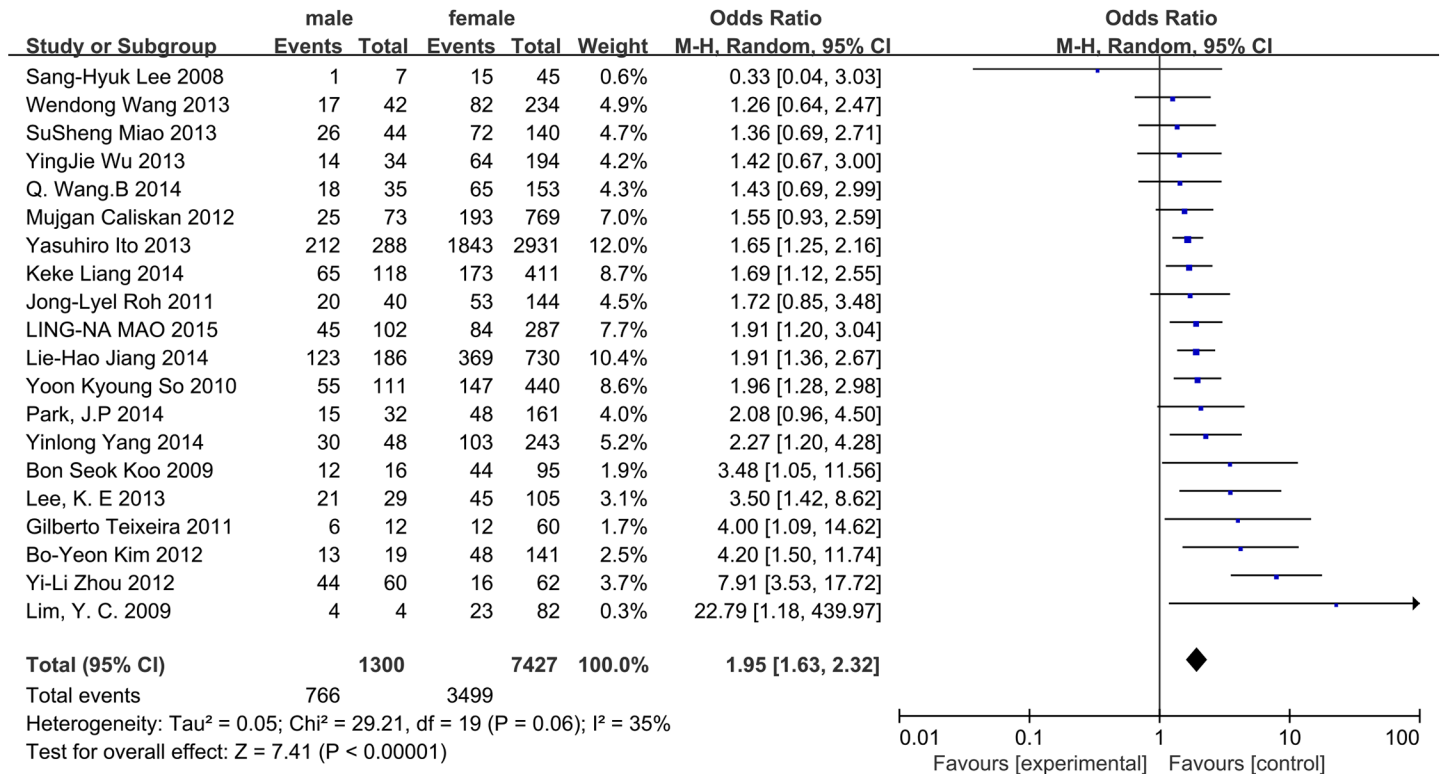

Fig 3. Forest plots of the association between sex and CLNM in CNO patients.

doi:10.1371/journal.pone.0139021.g003

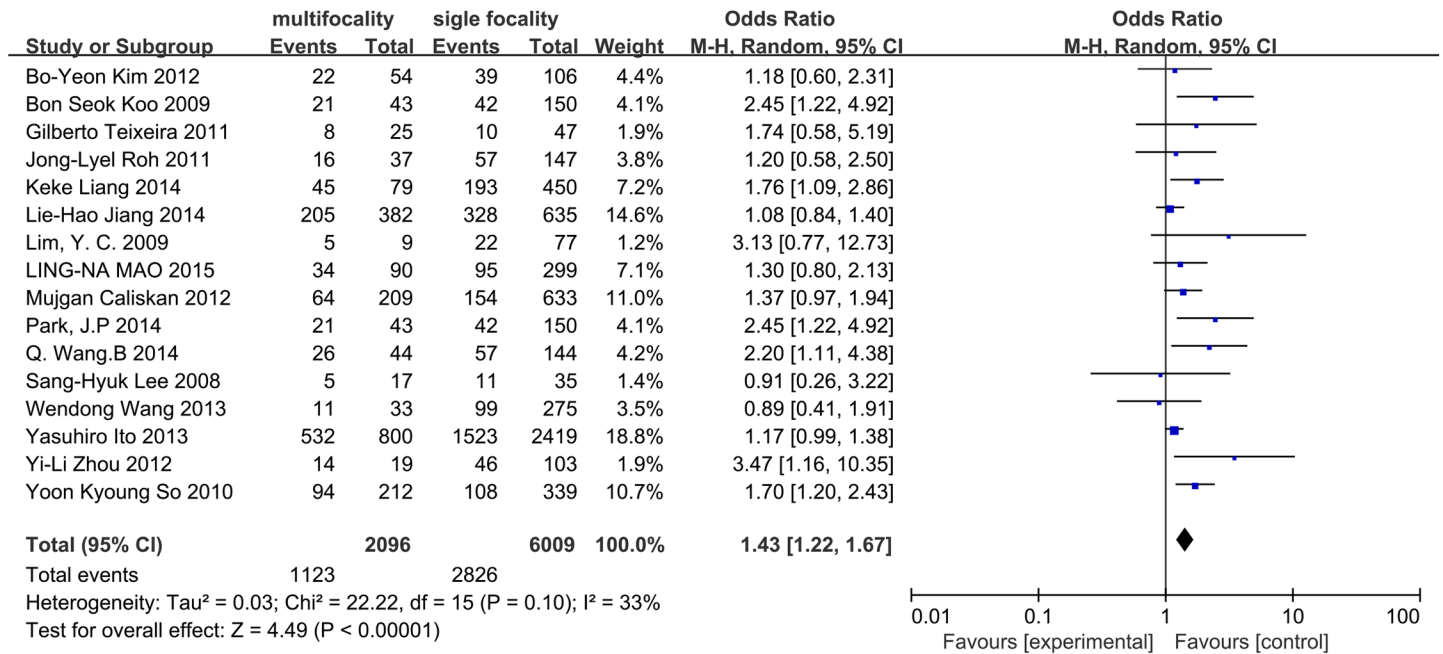

Fig 4. Forest plots of the association between multifocality and CLNM in CNO patients.

doi:10.1371/journal.pone.0139021.g004

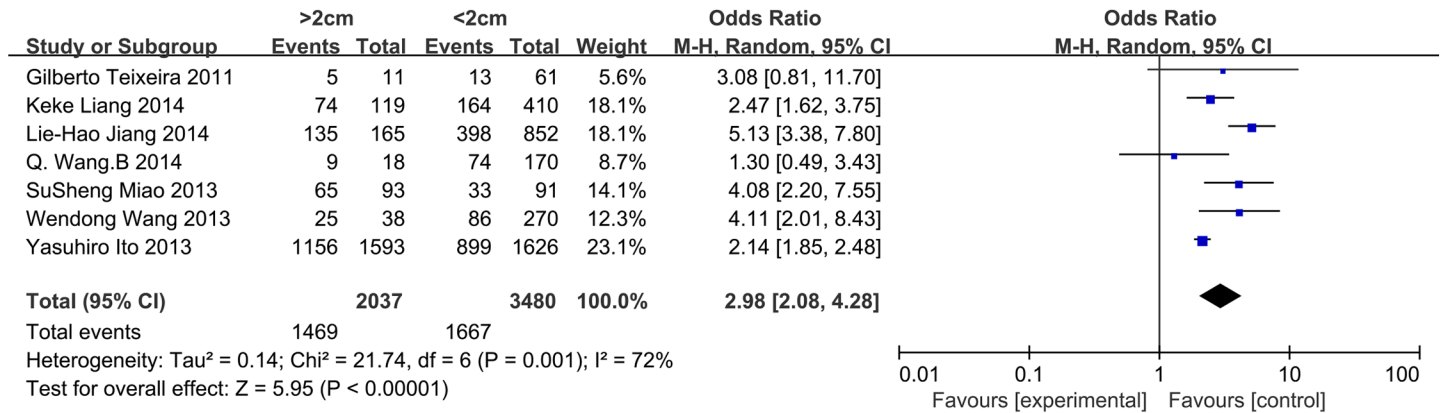

Fig 5. Forest plots of the association between size (PTC) and CLNM in CN0 patients.

doi:10.1371/journal.pone.0139021.g005

### Capsular invasion

A fixed-effects model was applied to our data ( $p = 0.12$ ,  $I^2 = 39\%$ ), and 8 studies were included in this analysis. We concluded that for CN0 patients, capsular invasion was associated with CLNM (OR = 1.72, 95% CI = 1.39–2.14,  $p = 0.001$ ) (Fig 10).

### Extrathyroidal extension

A random-effects model determined that the heterogeneity of the data on extrathyroidal extension was significant ( $p = 0.0001$ ,  $I^2 = 68\%$ ). A total of 14 papers and 7991 patients were included in this analysis. Extrathyroidal extension exhibited a high propensity to spread to central lymph nodes in CN0 patients (OR = 2.27, 95% CI = 1.76–2.94,  $p < 0.00001$ ) (Fig 11).

### Bilateral tumors

A fixed-effects model was applied due to insignificant heterogeneity ( $p = 0.15$ ,  $I^2 = 40\%$ ). Unilateral or bilateral tumors were evaluated in 5 studies. However, neither unilateral tumors nor bilateral tumors were associated with CLNM (OR = 1.21, 95% CI = 0.92–1.58,  $p = 0.17$ ) (Fig 12).

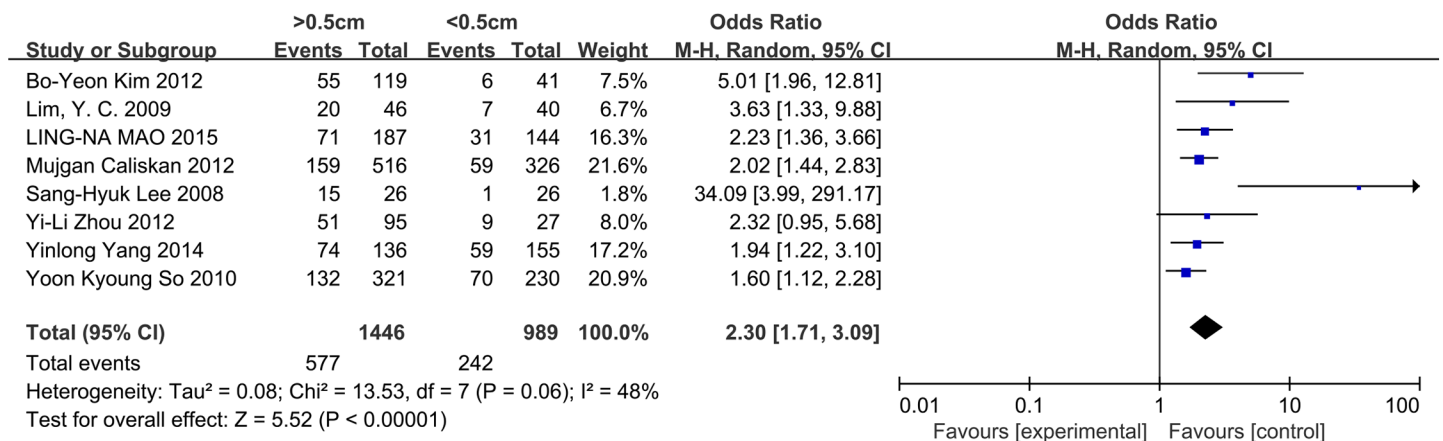

Fig 6. Forest plots of the association between size (PTMC) and CLNM in CN0 patients.

doi:10.1371/journal.pone.0139021.g006



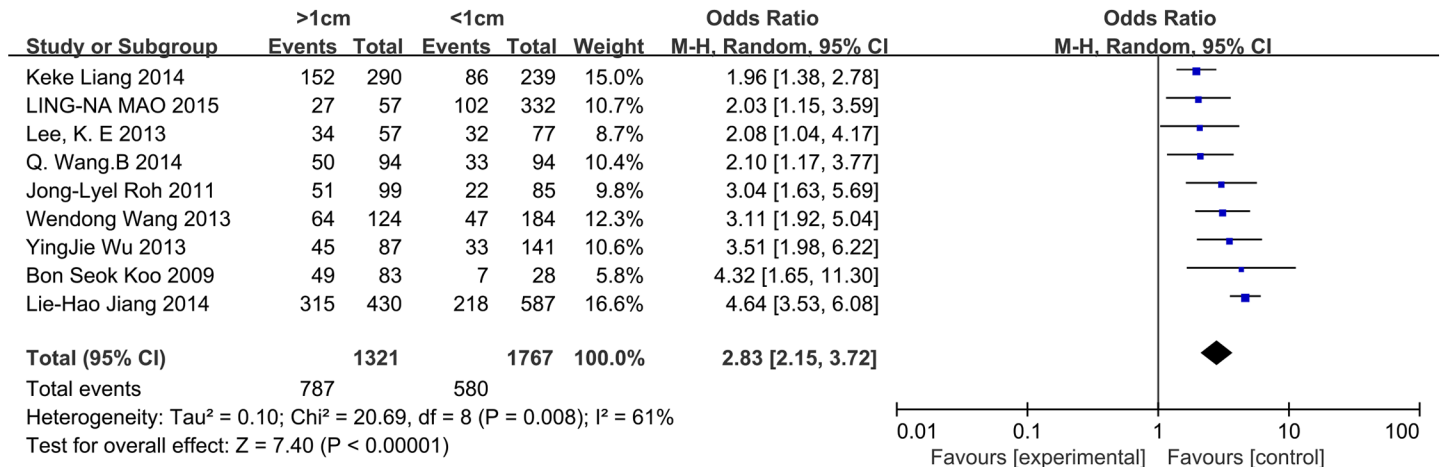

**Fig 7. Forest plots of the different prevalence of CLNM between PTC (tumor size>1cm) and PTMC (tumor size<1cm) in CNO patients.**

doi:10.1371/journal.pone.0139021.g007

### Hashimoto’s thyroiditis

A fixed-effects model was applied to analyze the data involving Hashimoto’s thyroiditis (I<sup>2</sup> = 44%, p = 0.11). In our database, a total of 6 studies were included, and CLNM was not associated with the coexistence of chronic Hashimoto’s thyroiditis (OR = 0.88, 95% CI = 0.71–1.09, p = 0.25) (Fig 13).

### Discussion

PTC exhibits low malignancy, relatively good prognosis and a generally positive response to surgery[3,4]. However, PTC also exhibits a high propensity to spread to regional lymph nodes. The central neck compartment is the primary zone of lymphatic involvement in PTC (20%-90% of patients), and CLNM is highly associated with recurrence and overall survival [5,6,44,45]. Patients with papillary thyroid microcarcinoma were also included in our review. PTMC is defined as a tumor that is 10 mm or less along its greatest dimension in accordance with the histologic classification of thyroid tumors by the World Health Organization[31]. The reasons to explore and finally operate on these patients are based on malignant findings from preoperative ultrasonography and fine-needle aspiration biopsy. For PTMC, CLNM appears to affect recurrence but not disease-free survival[15,16,46]. The prevalence of ipsilateral and

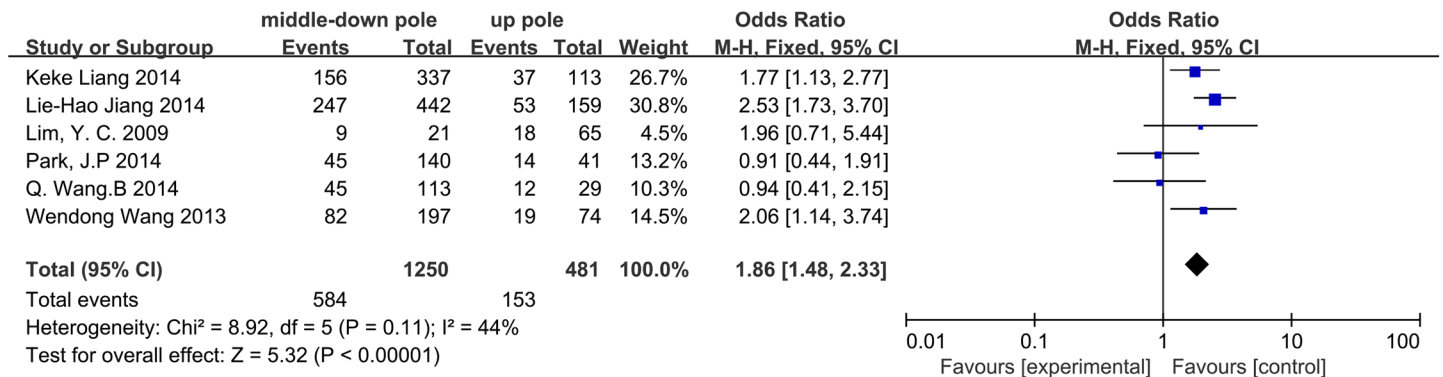

**Fig 8. Forest plots of the association between location and CLNM in CNO patients.**

doi:10.1371/journal.pone.0139021.g008

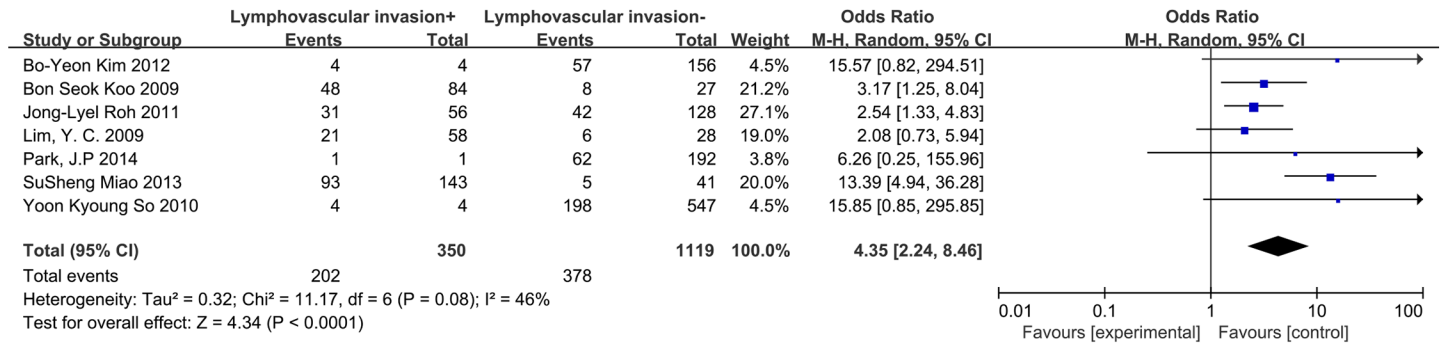

**Fig 9. Forest plots of the association between lymphovascular invasion and CLNM in CNO patients.**

doi:10.1371/journal.pone.0139021.g009

contralateral CLNM in the included studies in our analysis was 25%-63.83% and 9.24%-30.6%, respectively. The prevalence of ipsilateral CLNM was 25%-49.18% for PTMC (tumor size < 1cm) CNO patients and 47.37%-73.26% for PTC (tumor size > 1cm) CNO patients in our included studies. In the present meta-analysis, PTC (tumor size > 1cm) was associated with a higher risk factor than PTMC (tumor size < 1cm) in CNO patients (OR = 2.83, 95% CI = 2.15–3.72, p < 0.00001). Preoperative US and contrast-enhanced CT play important roles in screening for CLNM. However, the sensitivities of these techniques are inconsistent, ranging from 23%-53.2% and 41%-66.7% for preoperative US and contrast-enhanced CT, respectively [21,22]. The low sensitivity of US and CT may be due to the following reasons: First, central metastatic lymph nodes are so small that they may not be accurately detected by US and CT. Second, the existence of an intact thyroid gland increases the difficulty of examining posterior lymph nodes around the recurrent laryngeal nerve by US. Third, positive criteria for US and CT in the central neck have not yet been established [47]. In contrast to patients with clinically positive central neck metastasis, there remains controversy concerning how to manage PTC patients with clinically negative CLNM [48].

The leading treatment guidelines are not concordant when compared in relation to their recommendations regarding the application of PCLND. On one hand, the American Thyroid Association (ATA) guidelines recommend that routine PCLND should be performed only in patients with advanced T3 and T4 primary tumors [9]. However, this may not be appropriate,

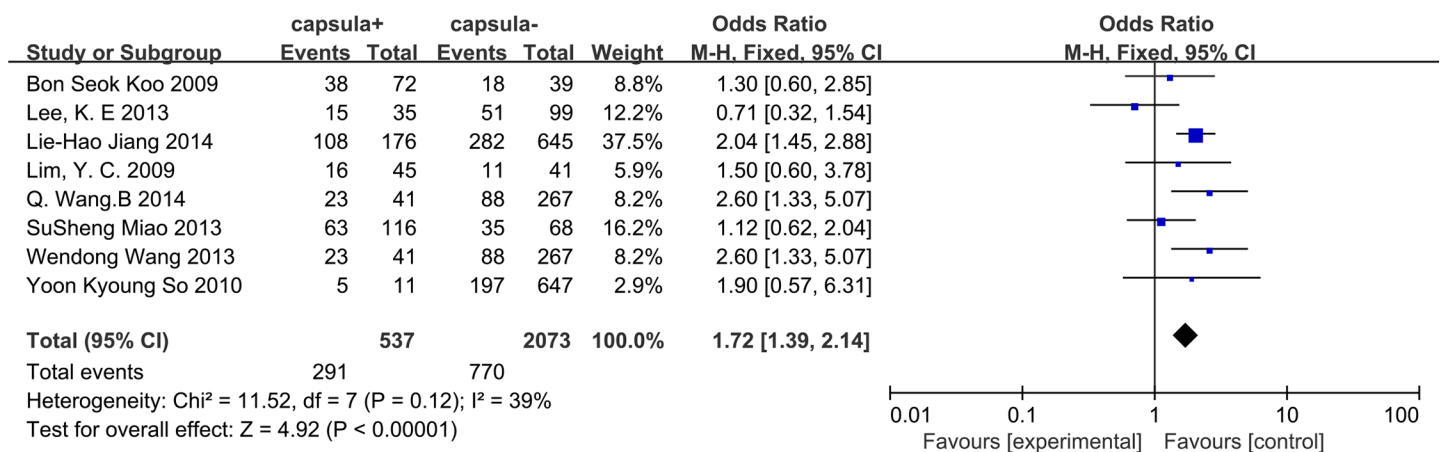

**Fig 10. Forest plots of the association between capsular invasion and CLNM in CNO patients.**

doi:10.1371/journal.pone.0139021.g010

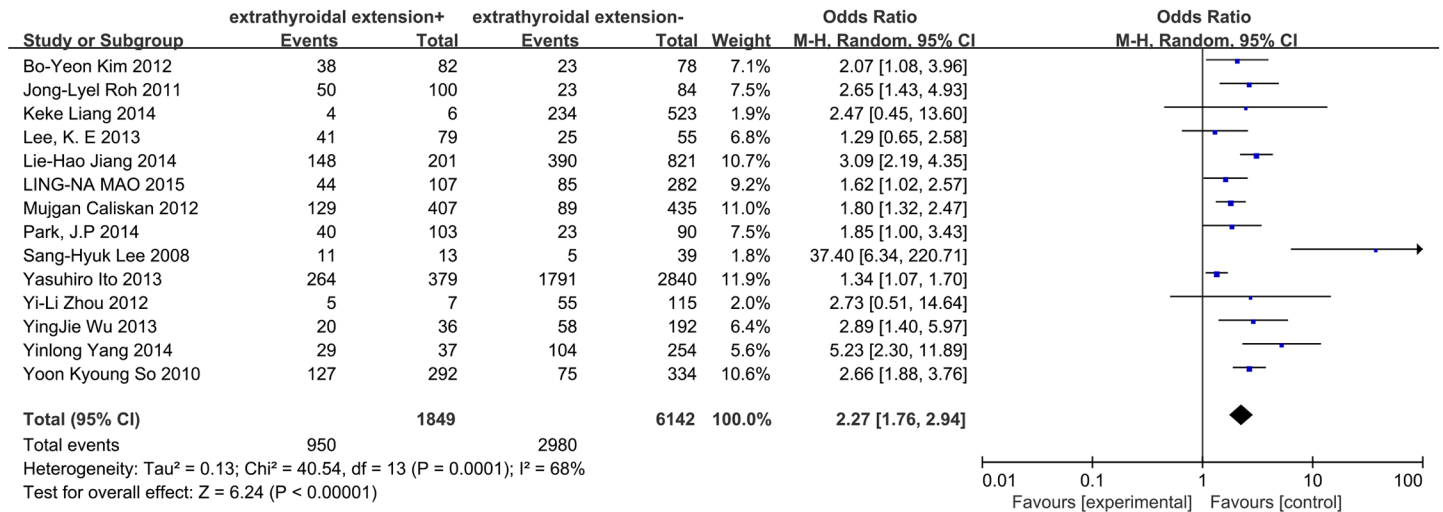

Fig 11. Forest plots of the association between extrathyroidal extension and CLNM in CN0 patients.

doi:10.1371/journal.pone.0139021.g011

as many T1 or T2 tumors also exhibit CLNM, and different clinicopathologic parameters may play crucial roles in CLNM[43]. The ATA restricts PCLND due to the limitations of its influence on prognosis and because the majority of thyroid surgeries in the United States are performed by surgeons who, according to National Inpatient Sample from 1988 through 2000, perform few such surgeries[49]. Currently, the number of surgeries performed by high-volume surgeons in USA is growing. Cases performed by high-volume surgeons increased from 12% in 1993 through 2000 to 25% in 2001 through 2008, in contrast cases performed by very-low volume surgeons decreased from 51% to 34%[50]. Inexperienced surgeons are associated with a greater rate of complications[51]. However, the Japanese Association of Endocrine Surgeons (JAES) routinely recommends PCLND. This may be attributed to the fact that the use of RAI is limited due to legal restrictions[52]. In conclusion, to more appropriately select patients for PCLND, a careful preoperative evaluation of the risk factors of CLNM in CN0 patients is required.

Many studies have focused on the risk factors of CLND for CN0 patients. However, the results are inconsistent. Age has been reported to be a risk factor in many studies. The cut-off age of 45 years is widely used as a clinical marker for prognosis[5]. Traditionally, patients older than 45 years are associated with poor prognosis and increased recurrence[53]. In our study,

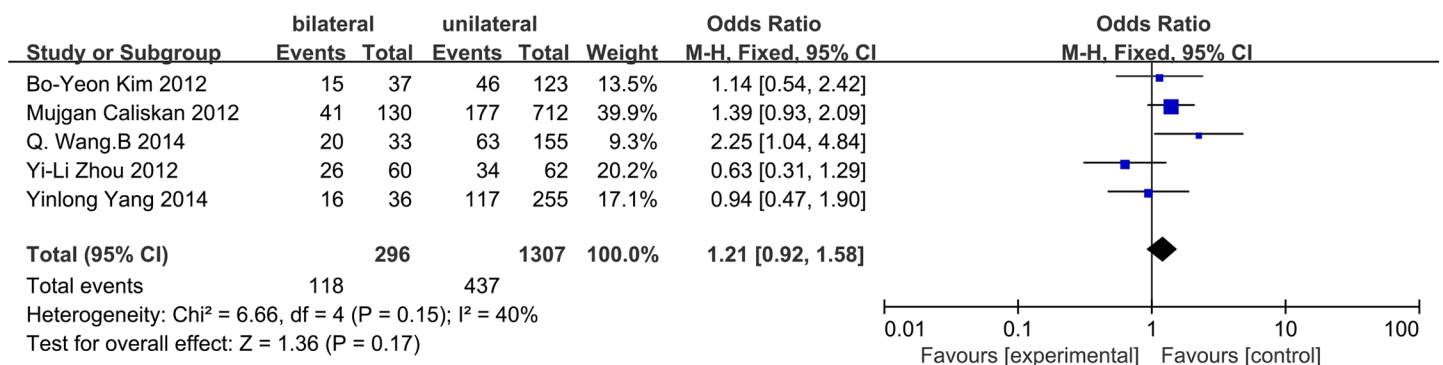

Fig 12. Forest plots of the association between bilateral tumors and CLNM in CN0 patients.

doi:10.1371/journal.pone.0139021.g012

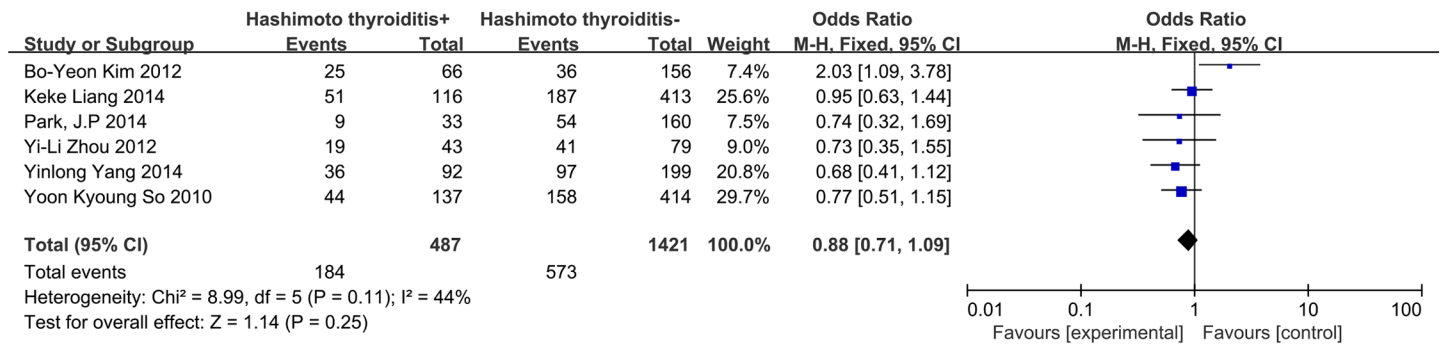

**Fig 13. Forest plots of the association between Hashimoto's thyroiditis and CLNM in CN0 patients.**

doi:10.1371/journal.pone.0139021.g013

we observed that age younger than 45 years is a significant risk factor for CLNM in CN0 patients. Some authors have reported a significant correlation between a higher risk of thyroid cancer and age younger than 45 years[54,55]. Do BA et al. reported that well-differentiated thyroid cancer and lymph node metastasis occurred more often in patients younger than 50 years [56].

Although the incidence of thyroid cancer is higher in women, the rates of malignancy and mortality due to thyroid cancer are higher in men[57,58]. Male sex was identified as a risk factor when patients with thyroid nodules were evaluated, and this factor may be suggestive of thyroid carcinoma[59]. Male patients are also more prone to unhealthy lifestyles and harmful environmental factors, such as smoking and drinking. Several studies have reported that men exhibited a poorer prognosis than women [60,61]. We concluded that male sex is a significant risk factor for CLNM in CN0 patients.

As always, tumor size is an important factor in TNM staging, and large tumors are more prone to be aggressive[62]. In our data, we observed that tumor size >2 cm exhibited a 2.98-fold increased risk of CLNM in CN0 patients. For PTMC, most studies consider 0.5 cm to be the cut-off value. In the present meta-analysis, we observed that tumors larger than 0.5 cm constitute an apparent risk factor. Other studies have reported that tumor sizes smaller than 0.5 cm exhibit no micrometastases or contralateral CLNM in CN0 patients[18,32].

Some studies have reported that multifocal PTC increases the risk of locoregional recurrence as well as lymph node metastasis and distant metastasis[63–65]. For years, multifocal PTC was considered the intraglandular spread of the primary tumor. Thus, multifocal PTC may be more aggressive than unifocal PTC[66]. Ning Qu et al. reported that an increasing number of tumors was associated with a tendency toward more aggressive features and predicted poor prognosis in PTC[43]. Whether multifocality is related to CLNM in CN0 patients remains controversial. In our study, we concluded that multifocality is a risk factor for CLNM.

The association between Hashimoto's thyroiditis (HT) and PTC was first proposed by Dailley et al. in 1955[67]. It remains controversial whether HT is associated with CLNM in PTC patients. Some studies suggest that the coexistence of HT is not associated with CLNM in PTC or PTMC patients[31,68]. However, another meta-analysis reported that PTCs with coexistent HT were significantly related to the absence of lymph node metastasis[69]. Our data indicated that there was no association between HT and CLNM in CN0 patients. The differences between our findings and previous conclusions may be related to different selection criteria and different study designs.

There are several limitations of this study. First, the included studies were not randomized case-control trials. Second, the types of thyroidectomies performed on the CN0 patients were not consistent and included total thyroidectomy, nearly total thyroidectomy, and lobectomy

plus isthmusectomy. Third, we only recorded ipsilateral CLNM from the studies in which level VI was divided into three or four groups. This recording method could have led to some unavoidable bias, as some patients only exhibited contralateral CLNM. Fourth, most of the patients from the included studies were from Asia.

In conclusion, this meta-analysis identified the following significant risk factors for central lymph node metastasis in CN0 patients: age, sex, multifocality, tumor size, tumor location, lymphovascular invasion, capsular invasion, and extrathyroidal extension. Bilateral tumors and Hashimoto's thyroiditis do not appear to be correlated with CLNM in CN0 patients.

## Supporting Information

**S1 PRISMA Checklist. PRISMA 2009 Checklist.**

(DOC)

**S1 Fig. Begg's funnel plot of the association between age and CLNM in CN0 patients.**

(EPS)

**S2 Fig. Begg's funnel plot of the association between sex and CLNM in CN0 patients.**

(EPS)

**S3 Fig. Begg's funnel plot of the association between multifocality and CLNM in CN0 patients.**

(EPS)

**S4 Fig. Begg's funnel plot of the association between size (PTC) and CLNM in CN0 patients.**

(EPS)

**S5 Fig. Begg's funnel plot of the association between size (PTMC) and CLNM in CN0 patients.**

(EPS)

**S6 Fig. Begg's funnel plot of the different prevalence of CLNM between PTC (tumor size > 1cm) and PTMC (tumor size < 1cm) in CN0 patients.**

(EPS)

**S7 Fig. Begg's funnel plot of the association between location and CLNM in CN0 patients.**

(EPS)

**S8 Fig. Begg's funnel plot of the association between lymphovascular invasion and CLNM in CN0 patients.**

(EPS)

**S9 Fig. Begg's funnel plot of the association between capsular invasion and CLNM in CN0 patients.**

(EPS)

**S10 Fig. Begg's funnel plot of the association between extrathyroidal extension and CLNM in CN0 patients.**

(EPS)

**S11 Fig. Begg's funnel plot of the association between bilateral tumors and CLNM in CN0 patients.**

(EPS)

**S12 Fig. Begg's funnel plot of the association between Hashimoto's thyroiditis and CLNM in CNO patients.**

(EPS)

**S1 Table. Original data of this systematic review and meta-analysis.**

(XLS)

## Acknowledgments

This work was supported by the Liaoning BaiQianWan Talents Program (No. 2014921033). The authors declare that no conflicts of interest exist with respect to the publication of this study. We thank American Journal Experts (AJE) for assisting in the language usage, spelling, and grammar of our manuscript.

## Author Contributions

Conceived and designed the experiments: HZ XBL WWD ZHW LH TZ SML WS. Performed the experiments: WS XBL. Analyzed the data: WS HZ. Contributed reagents/materials/analysis tools: WS HZ. Wrote the paper: WS.

## References

1. Lundgren CI, Hall P, Dickman PW, Zedenius J. Clinically significant prognostic factors for differentiated thyroid carcinoma: a population-based, nested case-control study. *Cancer*. 2006; 106: 524–531. PMID: [16369995](#)
2. Ferlay J, Shin HR, Bray F, Forman D, Mathers C, Parkin DM. Estimates of worldwide burden of cancer in 2008: GLOBOCAN 2008. *Int J Cancer*. 2010; 127: 2893–2917. doi: [10.1002/ijc.25516](#) PMID: [21351269](#)
3. Sciuto R, Romano L, Rea S, Marandino F, Sperduti I, Maini CL. Natural history and clinical outcome of differentiated thyroid carcinoma: a retrospective analysis of 1503 patients treated at a single institution. *Ann Oncol*. 2009; 20: 1728–1735. doi: [10.1093/annonc/mdp050](#) PMID: [19773250](#)
4. Toniato A, Boschini I, Casara D, Mazzarotto R, Rubello D, Pelizzo M. Papillary thyroid carcinoma: factors influencing recurrence and survival. *Ann Surg Oncol*. 2008; 15: 1518–1522. doi: [10.1245/s10434-008-9859-4](#) PMID: [18324441](#)
5. Grebe SK, Hay ID. Thyroid cancer nodal metastases: biologic significance and therapeutic considerations. *Surg Oncol Clin N Am*. 1996; 5: 43–63. PMID: [8789493](#)
6. Kouvaraki MA, Shapiro SE, Fornage BD, Edeiken-Monro BS, Sherman SI, Vassilopoulou-Sellin R, et al. Role of preoperative ultrasonography in the surgical management of patients with thyroid cancer. *Surgery*. 2003; 134: 946–954; discussion 954–945. PMID: [14668727](#)
7. White ML, Gauger PG, Doherty GM. Central lymph node dissection in differentiated thyroid cancer. *World J Surg*. 2007; 31: 895–904. PMID: [17347896](#)
8. Guerrero MA, Clark OH. Controversies in the management of papillary thyroid cancer revisited. *ISRN oncology*. 2011;303128. doi: [10.5402/2011/303128](#) PMID: [22091417](#)
9. Cooper DS, Doherty GM, Haugen BR, Kloos RT, Lee SL, Mandel SJ, et al. Revised American Thyroid Association management guidelines for patients with thyroid nodules and differentiated thyroid cancer. *Thyroid*. 2009; 19: 1167–1214. doi: [10.1089/thy.2009.0110](#) PMID: [19860577](#)
10. Moo TA, McGill J, Allendorf J, Lee J, Fahey T 3rd, Zarnegar R. Impact of prophylactic central neck lymph node dissection on early recurrence in papillary thyroid carcinoma. *World J Surg*. 2010; 34: 1187–1191. doi: [10.1007/s00268-010-0418-3](#) PMID: [20130868](#)
11. Mazzaferri EL, Doherty GM, Steward DL. The pros and cons of prophylactic central compartment lymph node dissection for papillary thyroid carcinoma. *Thyroid*. 2009; 19: 683–689. doi: [10.1089/thy.2009.1578](#) PMID: [19583485](#)
12. Shindo M, Wu JC, Park EE, Tanzella F. The importance of central compartment elective lymph node excision in the staging and treatment of papillary thyroid cancer. *Arch Otolaryngol Head Neck Surg*. 2006; 132: 650–654. PMID: [16785411](#)
13. Vini L, Hyer SL, Marshall J, A'Hern R, Harmer C. Long-term results in elderly patients with differentiated thyroid carcinoma. *Cancer*. 2003; 97: 2736–2742. PMID: [12767085](#)

14. Qu N, Zhang L, Ji QH, Zhu YX, Wang ZY, Shen Q, et al. Number of tumor foci predicts prognosis in papillary thyroid cancer. *BMC Cancer*. 2014; 14: 914. doi: [10.1186/1471-2407-14-914](https://doi.org/10.1186/1471-2407-14-914) PMID: [25471041](https://pubmed.ncbi.nlm.nih.gov/25471041/)
15. Wada N, Duh QY, Sugino K, Iwasaki H, Kameyama K, Mimura T, et al. Lymph node metastasis from 259 papillary thyroid microcarcinomas: frequency, pattern of occurrence and recurrence, and optimal strategy for neck dissection. *Ann Surg*. 2003; 237: 399–407. PMID: [12616125](https://pubmed.ncbi.nlm.nih.gov/12616125/)
16. Noguchi S, Yamashita H, Uchino S, Watanabe S. Papillary microcarcinoma. *World J Surg*. 2008; 32: 747–753. doi: [10.1007/s00268-007-9453-0](https://doi.org/10.1007/s00268-007-9453-0) PMID: [18264828](https://pubmed.ncbi.nlm.nih.gov/18264828/)
17. Fritz e D, Doherty GM. Surgical management of cervical lymph nodes in differentiated thyroid cancer. *Otolaryngol Clin North Am*. 2010; 43: 285–300, viii. doi: [10.1016/j.otc.2010.01.005](https://doi.org/10.1016/j.otc.2010.01.005) PMID: [20510715](https://pubmed.ncbi.nlm.nih.gov/20510715/)
18. Carty SE, Cooper DS, Doherty GM, Duh QY, Kloos RT, Mandel SJ, et al. Consensus statement on the terminology and classification of central neck dissection for thyroid cancer. *Thyroid*. 2009; 19: 1153–1158. doi: [10.1089/thy.2009.0159](https://doi.org/10.1089/thy.2009.0159) PMID: [19860578](https://pubmed.ncbi.nlm.nih.gov/19860578/)
19. Roh JL, Park JY, Park CI. Total thyroidectomy plus neck dissection in differentiated papillary thyroid carcinoma patients: pattern of nodal metastasis, morbidity, recurrence, and postoperative levels of serum parathyroid hormone. *Ann Surg*. 2007; 245: 604–610. PMID: [17414610](https://pubmed.ncbi.nlm.nih.gov/17414610/)
20. Cavicchi O, Piccin O, Caliceti U, De Cataldis A, Pasquali R, Ceroni AR. Transient hypoparathyroidism following thyroidectomy: a prospective study and multivariate analysis of 604 consecutive patients. *Otolaryngol Head Neck Surg*. 2007; 137: 654–658. PMID: [17903586](https://pubmed.ncbi.nlm.nih.gov/17903586/)
21. Choi JS, Kim J, Kwak JY, Kim MJ, Chang HS, Kim EK. Preoperative staging of papillary thyroid carcinoma: comparison of ultrasound imaging and CT. *AJR Am J Roentgenol*. 2009; 193: 871–878. doi: [10.2214/AJR.09.2386](https://doi.org/10.2214/AJR.09.2386) PMID: [19696304](https://pubmed.ncbi.nlm.nih.gov/19696304/)
22. Hwang HS, Orloff LA. Efficacy of preoperative neck ultrasound in the detection of cervical lymph node metastasis from thyroid cancer. *Laryngoscope*. 2011; 121: 487–491. doi: [10.1002/lary.21227](https://doi.org/10.1002/lary.21227) PMID: [21344423](https://pubmed.ncbi.nlm.nih.gov/21344423/)
23. Moher D, Liberati A, Tetzlaff J, Altman DG. Preferred reporting items for systematic reviews and meta-analyses: the PRISMA statement. *Int J Surg*. 2010; 8: 336–341. doi: [10.1016/j.ijsu.2010.02.007](https://doi.org/10.1016/j.ijsu.2010.02.007) PMID: [20171303](https://pubmed.ncbi.nlm.nih.gov/20171303/)
24. Lim YC, Choi EC, Yoon YH, Kim EH, Koo BS. Central lymph node metastases in unilateral papillary thyroid microcarcinoma. *Br J Surg*. 2009; 96: 253–257. doi: [10.1002/bjs.6484](https://doi.org/10.1002/bjs.6484) PMID: [19224514](https://pubmed.ncbi.nlm.nih.gov/19224514/)
25. Wu Y, Gu J, Shang J, Wang W, Wang K. Central lymph node metastasis in cN0 papillary thyroid carcinoma. *J BUON*. 2013; 18: 733–738. PMID: [24065492](https://pubmed.ncbi.nlm.nih.gov/24065492/)
26. Roh JL, Kim JM, Park CI. Central lymph node metastasis of unilateral papillary thyroid carcinoma: patterns and factors predictive of nodal metastasis, morbidity, and recurrence. *Ann Surg Oncol*. 2011; 18: 2245–2250. doi: [10.1245/s10434-011-1600-z](https://doi.org/10.1245/s10434-011-1600-z) PMID: [21327454](https://pubmed.ncbi.nlm.nih.gov/21327454/)
27. Wang Q, Chu B, Zhu J, Zhang S, Liu Y, Zhuang M, et al. Clinical analysis of prophylactic central neck dissection for papillary thyroid carcinoma. *Clin Transl Oncol*. 2014; 16: 44–48. doi: [10.1007/s12094-013-1038-9](https://doi.org/10.1007/s12094-013-1038-9) PMID: [23606353](https://pubmed.ncbi.nlm.nih.gov/23606353/)
28. Jiang LH, Chen C, Tan Z, Lu XX, Hu SS, Wang QL, et al. Clinical Characteristics Related to Central Lymph Node Metastasis in cN0 Papillary Thyroid Carcinoma: A Retrospective Study of 916 Patients. *Int J Endocrinol*. 2014; 2014: 385787. doi: [10.1155/2014/385787](https://doi.org/10.1155/2014/385787) PMID: [25214837](https://pubmed.ncbi.nlm.nih.gov/25214837/)
29. Wang W, Gu J, Shang J, Wang K. Correlation analysis on central lymph node metastasis in 276 patients with cN0 papillary thyroid carcinoma. *Int J Clin Exp Pathol*. 2013; 6: 510–515. PMID: [23412848](https://pubmed.ncbi.nlm.nih.gov/23412848/)
30. Zhou YL, Gao EL, Zhang W, Yang H, Guo GL, Zhang XH, et al. Factors predictive of papillary thyroid micro-carcinoma with bilateral involvement and central lymph node metastasis: a retrospective study. *World J Surg Oncol*. 2012; 10: 67. doi: [10.1186/1477-7819-10-67](https://doi.org/10.1186/1477-7819-10-67) PMID: [22540396](https://pubmed.ncbi.nlm.nih.gov/22540396/)
31. Kim BY, Jung CH, Kim JW, Lee SW, Kim CH, Kang SK, et al. Impact of clinicopathologic factors on sub-clinical central lymph node metastasis in papillary thyroid microcarcinoma. *Yonsei Med J*. 2012; 53: 924–930. doi: [10.3349/ymj.2012.53.5.924](https://doi.org/10.3349/ymj.2012.53.5.924) PMID: [22869474](https://pubmed.ncbi.nlm.nih.gov/22869474/)
32. Yang Y, Chen C, Chen Z, Jiang J, Chen Y, Jin L, et al. Prediction of central compartment lymph node metastasis in papillary thyroid microcarcinoma. *Clin Endocrinol (Oxf)*. 2014; 81: 282–288.
33. Miao S, Mao X, Pei R, Xiang C, Lv Y, Shi Q, et al. Predictive factors for different subgroups of central lymph node metastasis in unilateral papillary thyroid carcinoma. *ORL J Otorhinolaryngol Relat Spec*. 2013; 75: 265–273. doi: [10.1159/000354267](https://doi.org/10.1159/000354267) PMID: [24107609](https://pubmed.ncbi.nlm.nih.gov/24107609/)
34. Koo BS, Choi EC, Yoon YH, Kim DH, Kim EH, Lim YC. Predictive factors for ipsilateral or contralateral central lymph node metastasis in unilateral papillary thyroid carcinoma. *Ann Surg*. 2009; 249: 840–844. doi: [10.1097/SLA.0b013e3181a40919](https://doi.org/10.1097/SLA.0b013e3181a40919) PMID: [19387316](https://pubmed.ncbi.nlm.nih.gov/19387316/)

35. Park JP, Roh JL, Lee JH, Baek JH, Gong G, Cho KJ, et al. Risk factors for central neck lymph node metastasis of clinically noninvasive, node-negative papillary thyroid microcarcinoma. *Am J Surg.* 2014; 208: 412–418. doi: [10.1016/j.amjsurg.2013.10.032](https://doi.org/10.1016/j.amjsurg.2013.10.032) PMID: [24602323](https://pubmed.ncbi.nlm.nih.gov/24602323/)
36. Liang K, He L, Dong W, Zhang H. Risk factors of central lymph node metastasis in cN0 papillary thyroid carcinoma: a study of 529 patients. *Med Sci Monit.* 2014; 20: 807–811. doi: [10.12659/MSM.890182](https://doi.org/10.12659/MSM.890182) PMID: [24831428](https://pubmed.ncbi.nlm.nih.gov/24831428/)
37. So YK, Son YI, Hong SD, Seo MY, Baek CH, Jeong HS, et al. Subclinical lymph node metastasis in papillary thyroid microcarcinoma: a study of 551 resections. *Surgery.* 2010; 148: 526–531. doi: [10.1016/j.surg.2010.01.003](https://doi.org/10.1016/j.surg.2010.01.003) PMID: [20189620](https://pubmed.ncbi.nlm.nih.gov/20189620/)
38. Teixeira G, Teixeira T, Gubert F, Chikota H, Tufano R. The incidence of central neck micrometastatic disease in patients with papillary thyroid cancer staged preoperatively and intraoperatively as N0. *Surgery.* 2011; 150: 1161–1167. doi: [10.1016/j.surg.2011.09.019](https://doi.org/10.1016/j.surg.2011.09.019) PMID: [22136836](https://pubmed.ncbi.nlm.nih.gov/22136836/)
39. Ito Y, Fukushima M, Higashiyama T, Kihara M, Takamura Y, Kobayashi K, et al. Tumor size is the strongest predictor of microscopic lymph node metastasis and lymph node recurrence of N0 papillary thyroid carcinoma. *Endocr J.* 2013; 60: 113–117. PMID: [22972223](https://pubmed.ncbi.nlm.nih.gov/22972223/)
40. Lee KE, Chung IY, Kang E, Koo do H, Kim KH, Kim SW, et al. Ipsilateral and contralateral central lymph node metastasis in papillary thyroid cancer: patterns and predictive factors of nodal metastasis. *Head Neck.* 2013; 35: 672–676. doi: [10.1002/hed.23016](https://doi.org/10.1002/hed.23016) PMID: [22715063](https://pubmed.ncbi.nlm.nih.gov/22715063/)
41. Mao LN, Wang P, Li ZY, Wang Y, Song ZY. Risk factor analysis for central nodal metastasis in papillary thyroid carcinoma. *Oncol Lett.* 2015; 9: 103–107. PMID: [25435941](https://pubmed.ncbi.nlm.nih.gov/25435941/)
42. Caliskan M, Park JH, Jeong JS, Lee CR, Park SK, Kang SW, et al. Role of prophylactic ipsilateral central compartment lymph node dissection in papillary thyroid microcarcinoma. *Endocr J.* 2012; 59: 305–311. PMID: [22240889](https://pubmed.ncbi.nlm.nih.gov/22240889/)
43. Lee SH, Lee SS, Jin SM, Kim JH, Rho YS. Predictive factors for central compartment lymph node metastasis in thyroid papillary microcarcinoma. *Laryngoscope.* 2008; 118: 659–662. doi: [10.1097/MLG.0b013e318161f9d1](https://doi.org/10.1097/MLG.0b013e318161f9d1) PMID: [18176339](https://pubmed.ncbi.nlm.nih.gov/18176339/)
44. Pelizzo MR, Boschin IM, Toniato A, Piotto A, Pagetta C, Gross MD, et al. Papillary thyroid carcinoma: 35-year outcome and prognostic factors in 1858 patients. *Clin Nucl Med.* 2007; 32: 440–444. PMID: [17515749](https://pubmed.ncbi.nlm.nih.gov/17515749/)
45. Zaydfudim V, Feurer ID, Griffin MR, Phay JE. The impact of lymph node involvement on survival in patients with papillary and follicular thyroid carcinoma. *Surgery.* 2008; 144: 1070–1077; discussion 1077–1078. doi: [10.1016/j.surg.2008.08.034](https://doi.org/10.1016/j.surg.2008.08.034) PMID: [19041020](https://pubmed.ncbi.nlm.nih.gov/19041020/)
46. Ito Y, Tomoda C, Uruno T, Takamura Y, Miya A, Kobayashi K, et al. Clinical significance of metastasis to the central compartment from papillary microcarcinoma of the thyroid. *World J Surg.* 2006; 30: 91–99. PMID: [16369721](https://pubmed.ncbi.nlm.nih.gov/16369721/)
47. Lee DW, Ji YB, Sung ES, Park JS, Lee YJ, Park DW, et al. Roles of ultrasonography and computed tomography in the surgical management of cervical lymph node metastases in papillary thyroid carcinoma. *Eur J Surg Oncol.* 2013; 39: 191–196. doi: [10.1016/j.ejso.2012.07.119](https://doi.org/10.1016/j.ejso.2012.07.119) PMID: [22863305](https://pubmed.ncbi.nlm.nih.gov/22863305/)
48. Machens A, Hinze R, Thomusch O, Dralle H. Pattern of nodal metastasis for primary and reoperative thyroid cancer. *World J Surg.* 2002; 26: 22–28. PMID: [11898029](https://pubmed.ncbi.nlm.nih.gov/11898029/)
49. Saunders BD, Wainess RM, Dimick JB, Doherty GM, Upchurch GR, Gauger PG. Who performs endocrine operations in the United States? *Surgery.* 2003; 134: 924–931; discussion 931. PMID: [14668724](https://pubmed.ncbi.nlm.nih.gov/14668724/)
50. Loyo M, Tufano RP, Gourin CG. National trends in thyroid surgery and the effect of volume on short-term outcomes. *Laryngoscope.* 2013; 123: 2056–2063. doi: [10.1002/lary.23923](https://doi.org/10.1002/lary.23923) PMID: [23737403](https://pubmed.ncbi.nlm.nih.gov/23737403/)
51. Sosa JA, Bowman HM, Tielsch JM, Powe NR, Gordon TA, Udelsman R. The importance of surgeon experience for clinical and economic outcomes from thyroidectomy. *Ann Surg.* 1998; 228: 320–330. PMID: [9742915](https://pubmed.ncbi.nlm.nih.gov/9742915/)
52. Takami H, Ito Y, Okamoto T, Yoshida A. Therapeutic strategy for differentiated thyroid carcinoma in Japan based on a newly established guideline managed by Japanese Society of Thyroid Surgeons and Japanese Association of Endocrine Surgeons. *World J Surg.* 2011; 35: 111–121. doi: [10.1007/s00268-010-0832-6](https://doi.org/10.1007/s00268-010-0832-6) PMID: [21042913](https://pubmed.ncbi.nlm.nih.gov/21042913/)
53. Londero SC, Krogdahl A, Bastholt L, Overgaard J, Pedersen HB, Hahn CH, et al. Papillary thyroid carcinoma in Denmark, 1996–2008: outcome and evaluation of established prognostic scoring systems in a prospective national cohort. *Thyroid.* 2015; 25: 78–84. doi: [10.1089/thy.2014.0294](https://doi.org/10.1089/thy.2014.0294) PMID: [25368981](https://pubmed.ncbi.nlm.nih.gov/25368981/)
54. Raza SN, Shah MD, Palme CE, Hall FT, Eski S, Freeman JL. Risk factors for well-differentiated thyroid carcinoma in patients with thyroid nodular disease. *Otolaryngol Head Neck Surg.* 2008; 139: 21–26. doi: [10.1016/j.otohns.2007.10.021](https://doi.org/10.1016/j.otohns.2007.10.021) PMID: [18585556](https://pubmed.ncbi.nlm.nih.gov/18585556/)



55. Obregon-Guerrero G, Martinez-Ordaz JL, Pena-Garcia JF, Ramirez-Martinez ME, Perez-Alvarez C, Hernandez-Avendano CV. Factors associated with malignancy in patients with thyroid nodules. *Cir Cir*. 2010; 78: 479–484. PMID: [21214983](#)
56. Do BA, Payne RJ, Bastianelli M, Mlynarek AM, Tamilia M, Hier M, et al. Is age associated with risk of malignancy in thyroid cancer? *Otolaryngol Head Neck Surg*. 2014; 151: 746–750. doi: [10.1177/0194599814547503](#) PMID: [25151485](#)
57. Rahbari R, Zhang L, Kebebew E. Thyroid cancer gender disparity. *Future Oncol*. 2010; 6: 1771–1779. doi: [10.2217/fon.10.127](#) PMID: [21142662](#)
58. Libutti SK. Understanding the role of gender in the incidence of thyroid cancer. *Cancer J*. 2005; 11: 104–105. PMID: [15969983](#)
59. Hegedus L. Clinical practice. The thyroid nodule. *N Engl J Med*. 2004; 351: 1764–1771. PMID: [15496625](#)
60. Shaha AR, Shah JP, Loree TR. Risk group stratification and prognostic factors in papillary carcinoma of thyroid. *Ann Surg Oncol*. 1996; 3: 534–538. PMID: [8915484](#)
61. Besic N, Pilko G, Petric R, Hocevar M, Zgajnar J. Papillary thyroid microcarcinoma: prognostic factors and treatment. *J Surg Oncol*. 2008; 97: 221–225. PMID: [18050283](#)
62. Tuttle RM, Haddad RI, Ball DW, Byrd D, Dickson P, Duh QY, et al. Thyroid carcinoma, version 2.2014. *J Natl Compr Canc Netw*. 2014; 12: 1671–80. PMID: [25505208](#)
63. Tscholl-Ducommun J, Hedinger CE. Papillary thyroid carcinomas. Morphology and prognosis. *Virchows Arch A Pathol Anat Histol*. 1982; 396: 19–39. PMID: [7123844](#)
64. Katoh R, Sasaki J, Kurihara H, Suzuki K, Iida Y, Kawaoi A. Multiple thyroid involvement (intraglandular metastasis) in papillary thyroid carcinoma. A clinicopathologic study of 105 consecutive patients. *Cancer*. 1992; 70: 1585–1590. PMID: [1516009](#)
65. Mazzaferri EL, Jhiang SM. Long-term impact of initial surgical and medical therapy on papillary and follicular thyroid cancer. *Am J Med*. 1994; 97: 418–428. PMID: [7977430](#)
66. Mazeh H, Samet Y, Hochstein D, Mizrahi I, Ariel I, Eid A, et al. Multifocality in well-differentiated thyroid carcinomas calls for total thyroidectomy. *Am J Surg*. 2011; 201: 770–775. doi: [10.1016/j.amjsurg.2010.03.004](#) PMID: [20864083](#)
67. Dailey ME, Lindsay S, Skahen R. Relation of thyroid neoplasms to Hashimoto disease of the thyroid gland. *AMA Arch Surg*. 195; 70: 291–297.
68. Kim EY, Kim WG, Kim WB, Kim TY, Kim JM, Ryu JS, et al. Coexistence of chronic lymphocytic thyroiditis is associated with lower recurrence rates in patients with papillary thyroid carcinoma. *Clin Endocrinol (Oxf)*. 2009; 71: 581–586.
69. Lee JH, Kim Y, Choi JW, Kim YS. The association between papillary thyroid carcinoma and histologically proven Hashimoto's thyroiditis: a meta-analysis. *Eur J Endocrinol*. 2013; 168: 343–349. doi: [10.1530/EJE-12-0903](#) PMID: [23211578](#)
